# Supplementary material
Source: ML conference proceedings conference paper supplement (https://openreview.net/forum?id=SeGNvJJjbs)
Supplement: supplementary_material [file attachment]

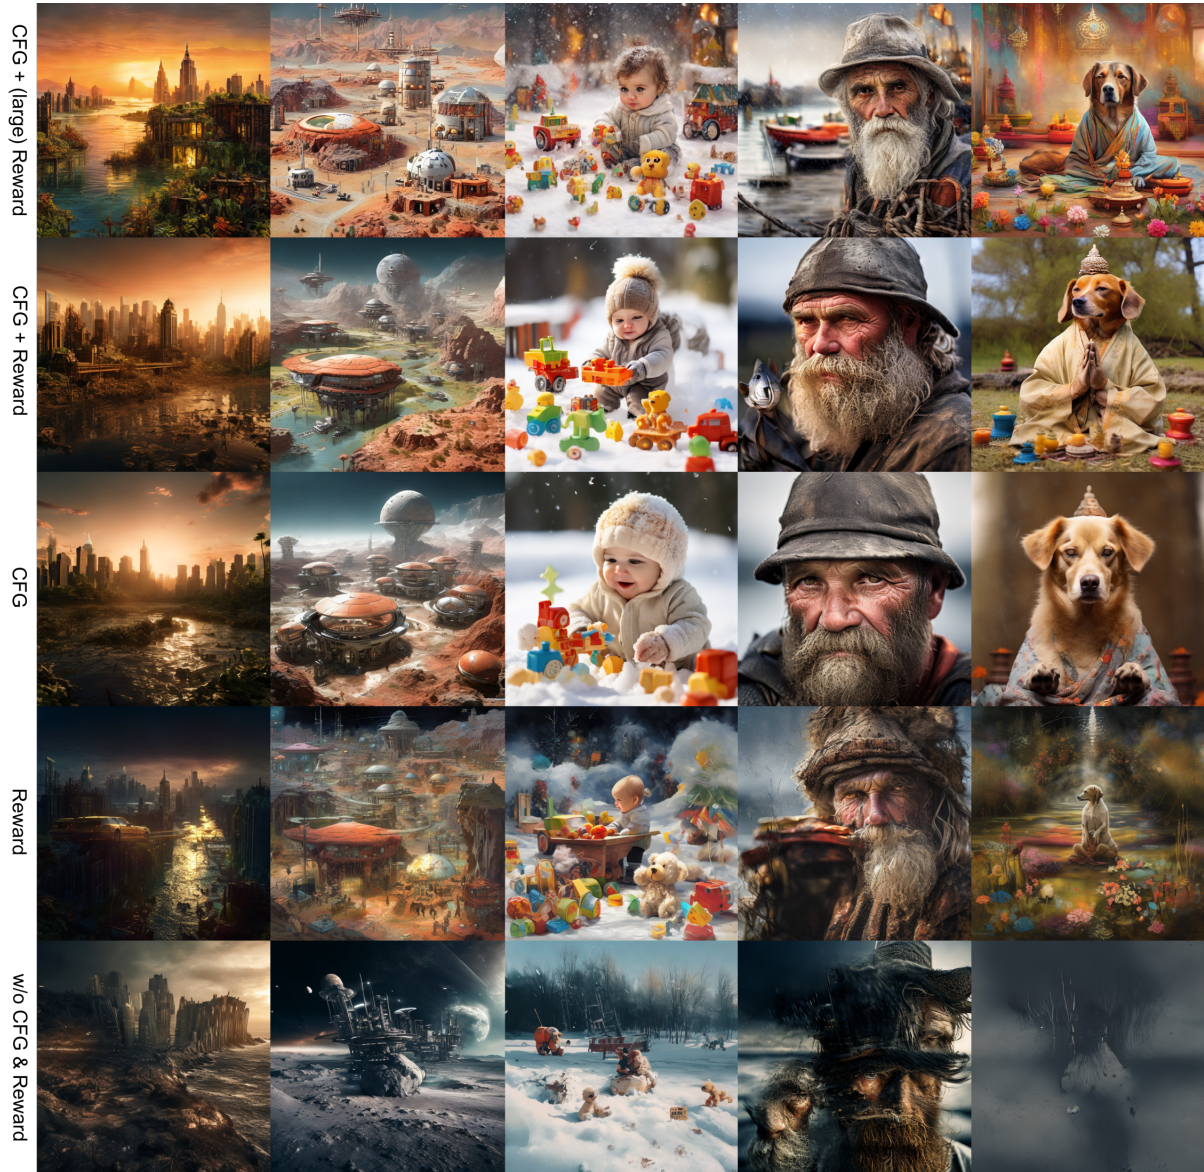

Figure 1: More qualitative comparison of different models trained with Diff-Instruct++.

## Supplementary Materials for Diff-Instruct++

Anonymous authors  
Paper under double-blind review

Move Generated Samples

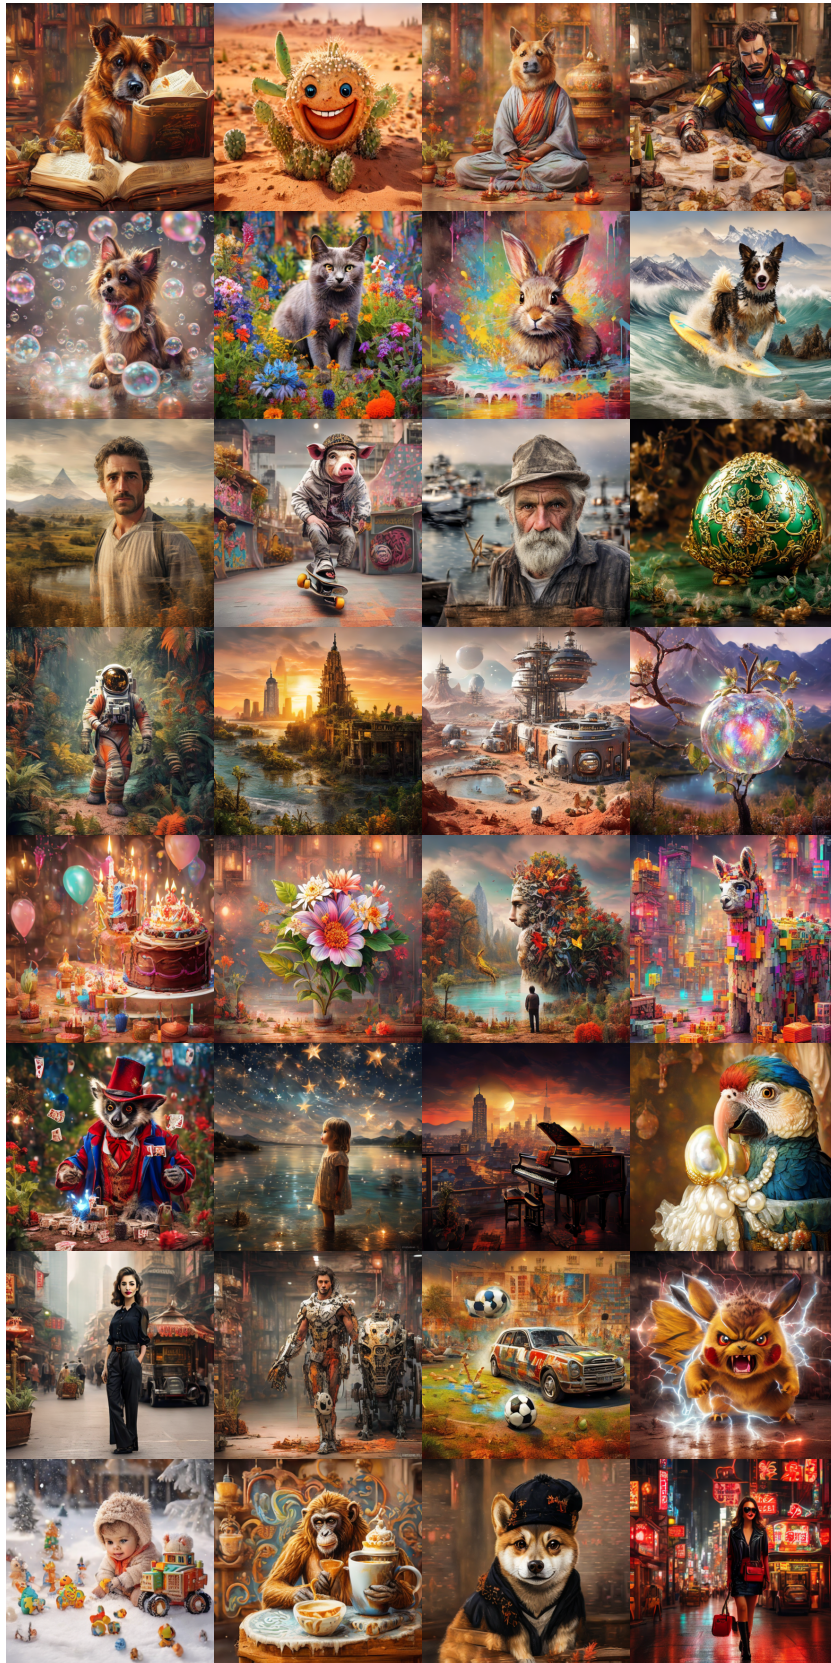

Figure 2: Unpicked images generated by one-step generator model aligned with 4.5 CFG and 10 Reward.

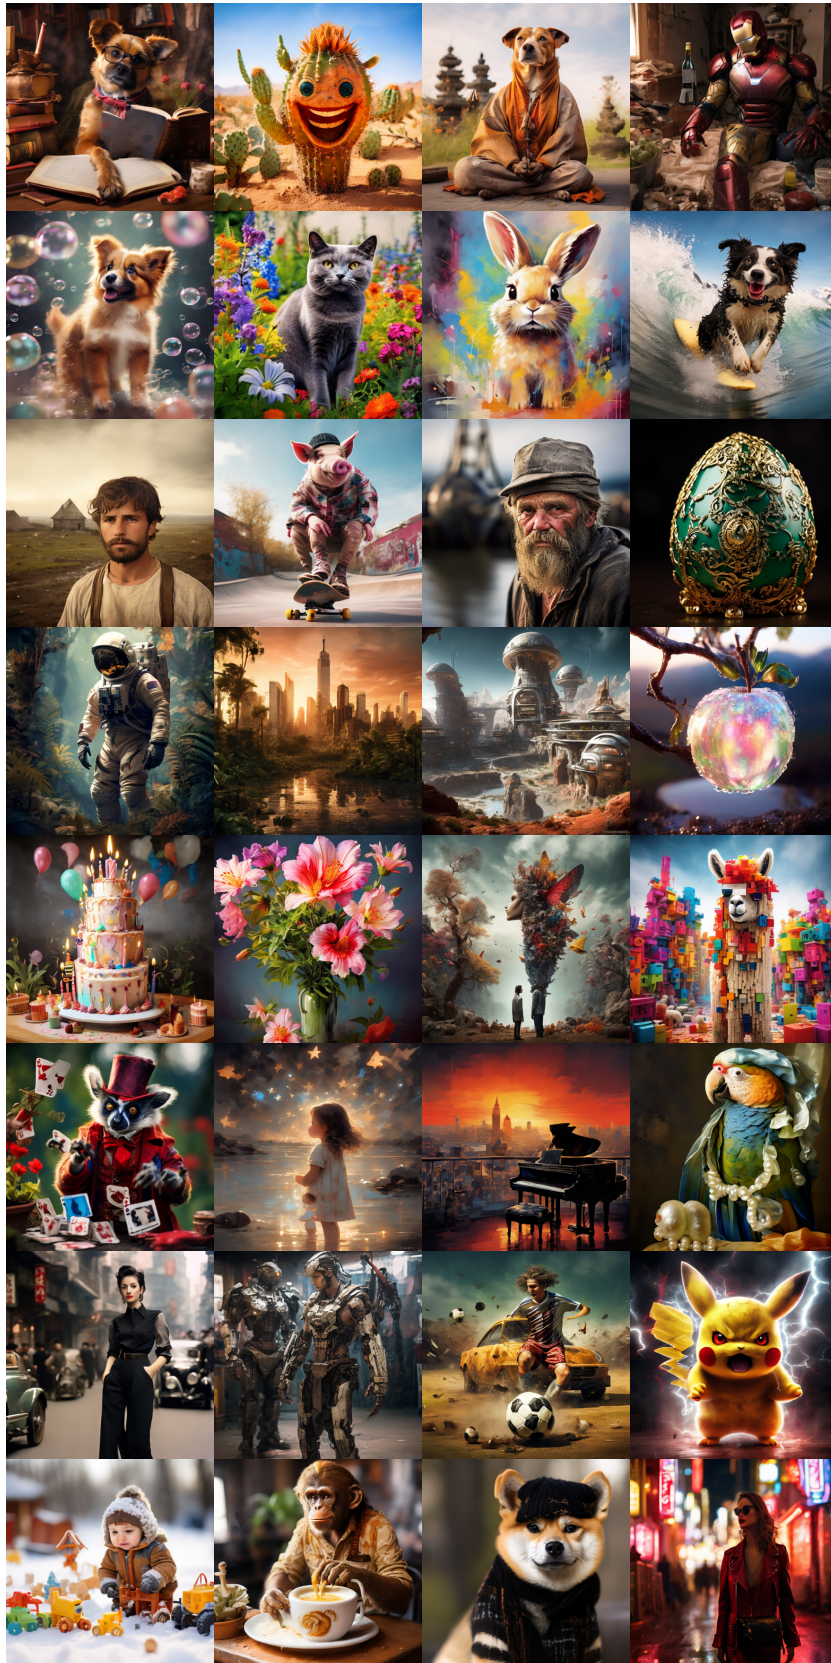

Figure 3: Unpicked images generated by one-step generator model aligned with 4.5 CFG and 1 Reward.

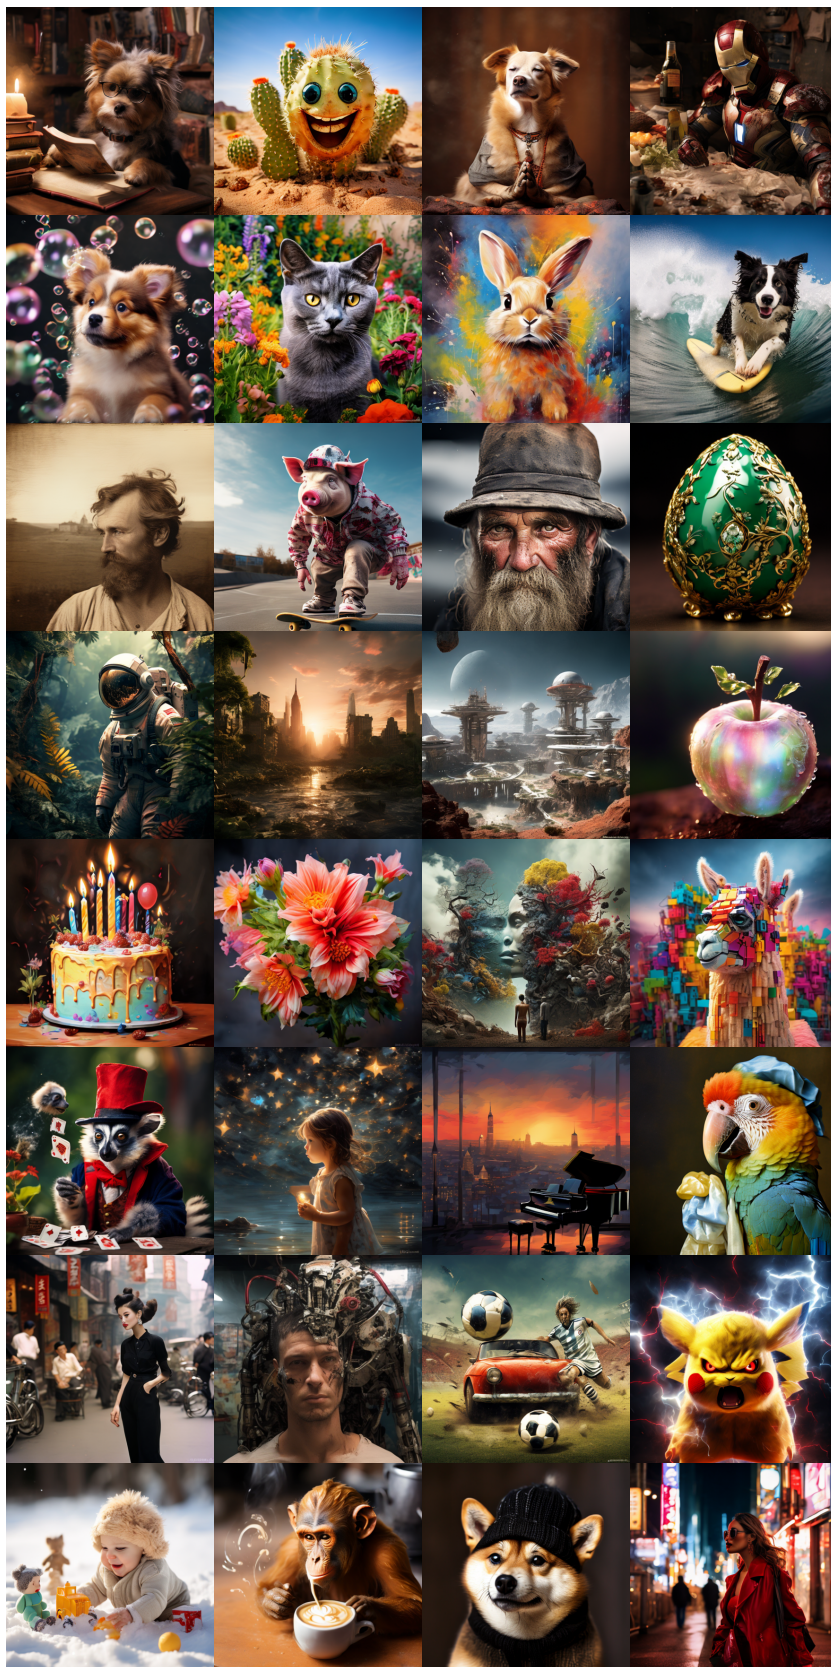

Figure 4: Unpicked images generated by one-step generator model aligned with 4.5 CFG and no Reward.

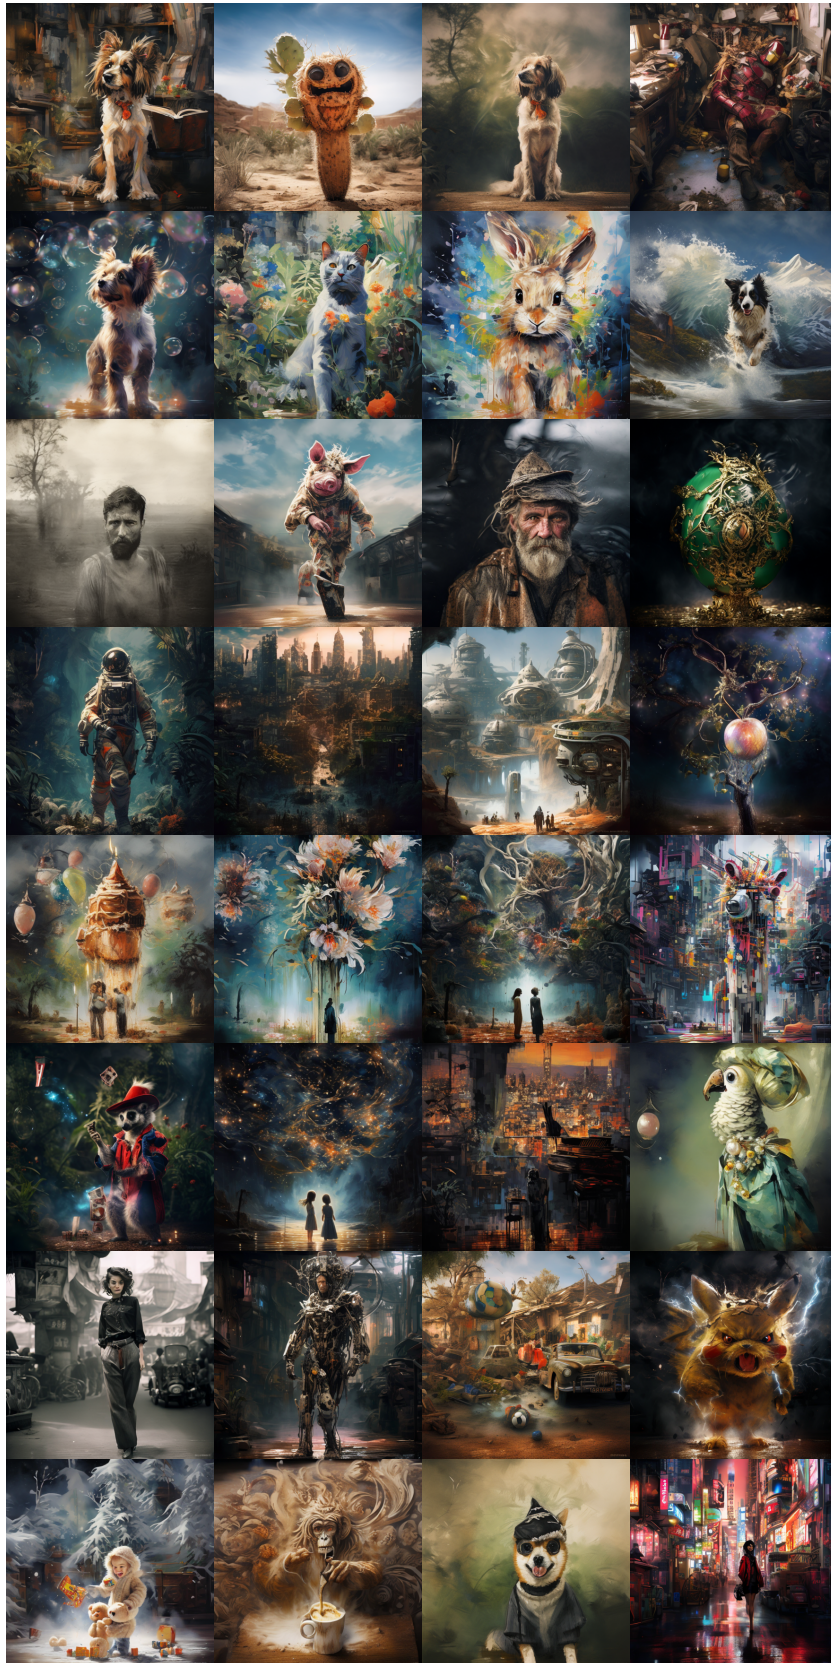

Figure 5: Unpicked images generated by one-step generator model aligned with 1 Reward.

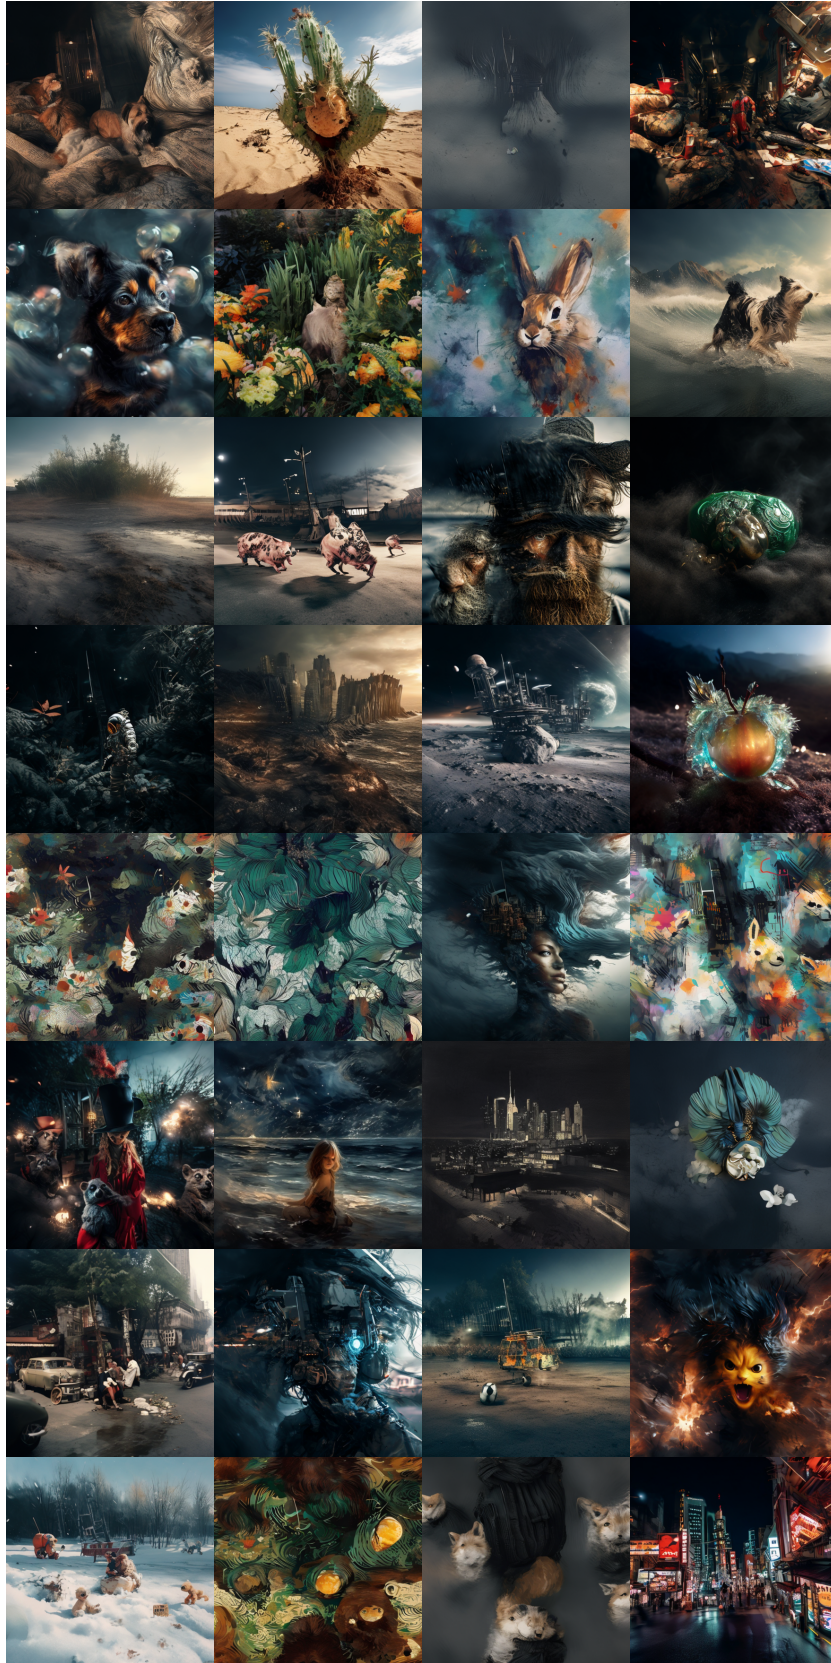

Figure 6: Unpicked images generated by the one-step generator model without alignment with either CFG or reward.
